# Supplementary material
Source: ML conference proceedings conference paper supplement (https://openreview.net/forum?id=7fRThuXp3h)
Supplement: supplementary_material [file attachment]

555 **A Datasheet**

556 The following is the datasheet (Gebreu et al., 2021) for Off-the-Grid Multi-Agent Reinforcement  
557 Learning (OG-MARL).

558 *Note: The OG-MARL repository will be released on GitHub after the anonymous review. For now the*  
559 *OG-MARL datasets and code is downloadable from our anonymised website:*

560 <https://sites.google.com/view/og-marl>

561 **A.1 Motivation**

562 **For what purpose was the dataset created?** The datasets in OG-MARL were created to facilitate  
563 research in offline Multi-Agent Reinforcement Learning (MARL). Offline MARL is a nascent field  
564 of machine learning that promises to unlock real-world applications of MARL. However, progress  
565 has been hampered by the lack of a standardised, high-quality benchmark datasets. OG-MARL was  
566 built to fill this gap and drive progress in the field.

567 **Who created the dataset and on behalf of which entity?** OG-MARL was created by <anonymous>  
568 on behalf of <anonymous> and <anonymous>.

569 **Who funded the creation of the dataset?** The creation of OG-MARL was funded by <anonymous>.

570 **A.2 Composition**

571 **What do the instances that comprise the dataset represent?** The various datasets in OG-MARL  
572 comprise of environment transitions in popular MARL benchmark environments (e.g. SMAC by  
573 Samvelyan et al. (2019)). The transitions were generated by recording environment interactions  
574 between policies trained using online RL.

575 **How many instances are there in total?** Each dataset in OG-MARL has approximately 1 million  
576 transitions in it.

577 **Does the dataset contain all possible instances or is it a sample of instances from a larger set?**  
578 Great care was taken to ensure that the dataset in OG-MARL had good coverage of the state and  
579 action space of the environment. It is however, not possible (nor desirable) to guarantee full coverage.

580 **What data does each instance consist of?** Each instance consists of a sequence of multi-agent  
581 transitions in the environment. A transition is composed of agent observations, actions, rewards and  
582 next observations  $(\{o_t^1, \dots, o_t^n\}, \{a_t^1, \dots, a_t^n\}, \{r_t^1, \dots, r_t^n\}, \{o_{t+1}^1, \dots, o_{t+1}^n\})$ .

583 **Is there a label or target associated with each instance?** As we are in the reinforcement learning  
584 paradigm, instances do not have *labels*. However, since each instance is a multi-agent transition, they  
585 do each have a corresponding reward for each agent, which we use for training.

586 **Is any information missing from individual instances?** Everything is included. No data is missing.

587 **Are relationships between individual instances made explicit?** Transitions that belong to the same  
588 episode can be retrieved together, if desired.

589 **Are there recommended data splits?** In offline RL one does not need to split data like in supervised  
590 learning. All data can be used for training.

591 **Are there any errors, sources of noise, or redundancies in the dataset?** None.

592 **Is the dataset self-contained, or does it link to or otherwise rely on external resources?** OG-  
593 MARL is completely self-contained. The datasets are stored in a binary format but can be loaded into  
594 a dataset loader with the utilities provided in the OG-MARL code.

595 **Does the dataset contain data that might be considered confidential?** No.

596 **Does the dataset contain data that, if viewed directly, might be offensive, insulting, threatening,**  
597 **or might otherwise cause anxiety?** No.

598 **Does the dataset identify any subpopulations?** No.

599 **Is it possible to identify individuals, either directly or indirectly from the dataset?** No.

600 **Does the dataset contain data that might be considered sensitive in any way?** No.

### 601 **A.3 Collection Process**

602 **How was the data associated with each instance acquired?** To generate the datasets for OG-MARL  
603 we trained online MARL algorithms on a variety of popular MARL benchmark environments and  
604 recorded the environment transitions.

605 **What mechanisms or procedures were used to collect the data?** We trained our online MARL  
606 algorithms on a PC with a GPU (Nvidia RTX 3070) and recorded experiences with a python utility  
607 we designed and subsequently open-sourced to the community.

608 **If the dataset is a sample from a larger set, what was the sampling strategy?** The different  
609 datasets in OG-MARL have different data compositions. We grouped transitions into Good, Medium  
610 and Poor according to the return of episode that the transition belonged to.

611 **Who was involved in the data collection process?** <Anonymous> and <anonymous>.

612 **Over what timeframe was the data collected?** The datasets in the current version of OG-MARL  
613 were collected over a period of about 3 months.

614 **Were any ethical review processes conducted?** No, since it is believed that none was required.

615 **Did you collect the data from the individuals in question directly, or obtain it via third parties  
616 or other sources** No.

617 **Were the individuals in question notified about the data collection?** Not applicable.

618 **Did the individuals in question consent to the collection and use of their data?** Not applicable.

619 **If consent was obtained, were the consenting individuals provided with a mechanism to revoke  
620 their consent in the future or for certain uses?** Not applicable.

621 **Has an analysis of the potential impact of the dataset and its use on data subjects been con-  
622 ducted?** Not applicable.

### 623 **A.4 Preprocessing/Cleaning/Labeling**

624 **Was any preprocessing/cleaning/labeling of the data done?** Transitions were grouped into short  
625 continuous sequences to allow for training recurrent policies.

626 **Was the “raw” data saved in addition to the preprocessed/cleaned/labeled data?** Individual  
627 transitions can be loaded instead of sequences.

628 **Is the software that was used to preprocess/clean/label the data available?** Yes, in the OG-MARL  
629 repository.

### 630 **A.5 Uses**

631 **Has the dataset been used for any tasks already?** Yes. [Zhu et al. \(2023\)](#) and [Formanek et al. \(2023\)](#)  
632 both used OG-MARL.

633 **Is there a repository that links to any or all papers or systems that use the dataset?** There is a  
634 repository hosted by <anonymous> at <anonymous>.

635 **What (other) tasks could the dataset be used for?** OG-MARL could be used for any kind of  
636 sequential decision-making research.

637 **Is there anything about the composition of the dataset or the way it was collected and prepro-**  
638 **cessed/cleaned/labeled that might impact future uses?** Loading entire episodes of transitions  
639 needs to be made easier in future releases.

640 **Are there tasks for which the dataset should not be used?** The data in OG-MARL was generated  
641 on simplified environments and does not necessarily generalise to the real world.

## 642 **A.6 Distribution**

643 **Will the dataset be distributed to third parties outside of the entity on behalf of which the**  
644 **dataset was created?** Yes, OG-MARL is publicly available on the internet.

645 **How will the dataset will be distributed?** OG-MARL datasets are hosted in an S3 bucket but can  
646 easily be accessed via our publicly open website or by running the download scripts in the OG-MARL  
647 code.

648 **When will the dataset be distributed?** The datasets were released in February of 2023.

649 **Will the dataset be distributed under a copyright or other intellectual property (IP) license,**  
650 **and/or under applicable terms of use (ToU)?** We have applied the *CC BY-NC-SA* dataset licence to  
651 OG-MARL.

652 **Have any third parties imposed IP-based or other restrictions on the data associated with the**  
653 **instances?** No.

654 **Do any export controls or other regulatory restrictions apply to the dataset or to individual**  
655 **instances?** No.

## 656 **A.7 Maintenance**

657 **Who will be supporting/hosting/maintaining the dataset?** <Anonymous> will be responsible for  
658 maintaining the datasets on behalf of <anonymous>, who will also be financially supporting the  
659 hosting of the datasets.

660 **How can the owner/curator/manager of the dataset be contacted?** Via email, <anonymous>.

661 **Is there an erratum?** Versioning and changes are tracked on the OG-MARL repository, <anony-  
662 mous>.

663 **Will the dataset be updated?** OG-MARL is a growing collection of offline MARL datasets. The  
664 creator and the wider community will be adding new datasets over time.

665 **If the dataset relates to people, are there applicable limits on the retention of the data associated**  
666 **with the instances?** Not applicable.

667 **Will older versions of the dataset continue to be supported/hosted/maintained?** Yes.

668 **If others want to extend/augment/build on/contribute to the dataset, is there a mechanism for**  
669 **them to do so?** Yes, please open a pull request on the OG-MARL repository.

670 **B Additional Environment Information**

671 In this section we provide additional information of all of the environments supported in OG-MARL.  
 672 In [Table B.1](#) we provide an overview of salient environment characteristics, in addition to the  
 673 algorithm which was used to generate the behaviour policies. In [Table B.2](#) we provide links to the  
 674 source of the environments for the reader to refer to for additional information about the environments.

Table B.1: All supported environments and scenarios in OG-MARL and some of their characteristics.

| Environment     | Scenario          | Agents | Actions    | Observations | Reward | Agent Types | Behaviour | Online Perf. |
|-----------------|-------------------|--------|------------|--------------|--------|-------------|-----------|--------------|
| SMAC            | 3m                | 3      |            |              |        | Homog       |           | 16.1         |
|                 | 8m                | 8      |            |              |        | Homog       |           | 16.2         |
|                 | 2s3z              | 5      |            |              |        | Heterog     |           | 18.2         |
|                 | 5m_vs_6m          | 5      | Discrete   | Vector       | Dense  | Homog       | QMIX      | 16.6         |
|                 | 27m_vs_30m        | 27     |            |              |        | Homog       |           | 16.0         |
|                 | 3s5z_vs_3s6z      | 8      |            |              |        | Heterog     |           | 17.0         |
|                 | 2c_vs_64zg        | 2      |            |              |        | Homog       |           | 18.0         |
| MAMuJoCo        | 2-HalfCheetah     | 2      |            |              |        | Heterog     |           | 6924         |
|                 | 2-Ant             | 2      | Continuous | Vector       | Dense  | Homog       | MATD3     | 2621         |
|                 | 4-Ant             | 4      |            |              |        | Homog       |           | 2769         |
| PettingZoo      | Pursuit           | 8      | Discrete   |              |        | Homog       | QMIX      | 79.5         |
|                 | Co-op Pong        | 2      | Discrete   | Pixels       | Dense  | Heterog     | IDQN      | 65.1         |
|                 | Pistonball        | 15     | Continuous |              |        | Homog       | MATD3     | 84.6         |
| Flatland        | 3 Trains          | 3      |            |              |        |             |           | -5.1         |
|                 | 5 Trains          | 5      | Discrete   | Vector       | Dense  | Homog       | IDQN      | -5.9         |
| SMAC v2         | terran_5_vs_5     | 5      |            |              |        |             |           | 17.0         |
|                 | zerg_5_vs_5       | 5      | Discrete   | Vector       | Dense  | Heterog     | QMIX      | 15.2         |
|                 | terran_10_vs_10   | 10     |            |              |        |             |           | 16.9         |
| CityLearn       | 2022_all_phases   | 17     | Continuous | Vector       | Dense  | Homog       | ITD3      | -6421        |
| Voltage Control | case33_3min_final | 6      | Continuous | Vector       | Dense  | Homog       | ITD3      | -12.3        |

Table B.2: All environments with links to their sources.

| Environment     | Website                                                                                                                           |
|-----------------|-----------------------------------------------------------------------------------------------------------------------------------|
| SMAC v1         | <a href="https://github.com/oxwhirl/smac">https://github.com/oxwhirl/smac</a>                                                     |
| SMAC v2         | <a href="https://github.com/oxwhirl/smacv2">https://github.com/oxwhirl/smacv2</a>                                                 |
| PettingZoo      | <a href="https://pettingzoo.farama.org/">https://pettingzoo.farama.org/</a>                                                       |
| Flatland        | <a href="https://flatland.aicrowd.com/intro.html">https://flatland.aicrowd.com/intro.html</a>                                     |
| MAMuJoCo        | <a href="https://github.com/schroederdewitt/multiagent_mujoco">https://github.com/schroederdewitt/multiagent_mujoco</a>           |
| CityLearn       | <a href="https://github.com/intelligent-environments-lab/CityLearn">https://github.com/intelligent-environments-lab/CityLearn</a> |
| Voltage Control | <a href="https://github.com/Future-Power-Networks/MAPDN">https://github.com/Future-Power-Networks/MAPDN</a>                       |

675 **C Additional Information on Datasets**

676 In this section, we provide additional information about the datasets in OG-MARL. In [Table C.1](#) we  
 677 give the mean episode return with standard deviation for all datasets in OG-MARL.

Table C.1: Table of the mean episode return with the standard deviation for all datasets in OG-MARL.

| Environment     | Scenario          | Dataset        | Mean Episode Return ( $\pm$ Std) | Number of Sequences |
|-----------------|-------------------|----------------|----------------------------------|---------------------|
| SMAC            | 3m                | Good           | 16.0 $\pm$ 6.1                   | 120569              |
|                 |                   | Medium         | 10.0 $\pm$ 6.0                   | 120004              |
|                 |                   | Poor           | 4.8 $\pm$ 2.3                    | 118447              |
|                 | 8m                | Good           | 16.3 $\pm$ 4.4                   | 111873              |
|                 |                   | Medium         | 10.3 $\pm$ 3.4                   | 120845              |
|                 |                   | Poor           | 5.3 $\pm$ 0.6                    | 109515              |
|                 | 5m_vs_6m          | Good           | 16.6 $\pm$ 4.7                   | 112779              |
|                 |                   | Medium         | 12.8 $\pm$ 5.1                   | 117594              |
|                 |                   | Poor           | 7.7 $\pm$ 1.5                    | 110031              |
|                 | 2s3z              | Good           | 18.2 $\pm$ 2.9                   | 107900              |
|                 |                   | Medium         | 12.8 $\pm$ 3.1                   | 107640              |
|                 |                   | Poor           | 6.8 $\pm$ 2.1                    | 101197              |
|                 | 3s5z_vs3s6z       | Good           | 17.0 $\pm$ 3.3                   | 101335              |
|                 |                   | Medium         | 11.0 $\pm$ 1.7                   | 107873              |
|                 |                   | Poor           | 5.7 $\pm$ 2.3                    | 107475              |
| 2c_vs_64zg      | Good              | 18.0 $\pm$ 2.2 | 108270                           |                     |
|                 | Medium            | 13.1 $\pm$ 2.0 | 111199                           |                     |
|                 | Poor              | 9.9 $\pm$ 1.6  | 115370                           |                     |
| 27m_vs_30m      | Good              | 16.0 $\pm$ 2.1 | 110271                           |                     |
|                 | Medium            | 10.5 $\pm$ 1.2 | 113737                           |                     |
|                 | Poor              | 5.7 $\pm$ 2.5  | 110845                           |                     |
| MAMuJoCo        | 2-HalfCheetah     | Good           | 6924 $\pm$ 1270                  | 100000              |
|                 |                   | Medium         | 1484 $\pm$ 469                   | 100000              |
|                 |                   | Poor           | 400 $\pm$ 333                    | 100000              |
|                 | 2-Ant             | Good           | 2621 $\pm$ 493                   | 100041              |
|                 |                   | Medium         | 1099 $\pm$ 264                   | 100109              |
|                 |                   | Poor           | 437 $\pm$ 164                    | 99804               |
|                 | 4-Ant             | Good           | 2769 $\pm$ 270                   | 100170              |
|                 |                   | Medium         | 1546 $\pm$ 389                   | 100215              |
|                 |                   | Poor           | 542 $\pm$ 216                    | 100224              |
| PettingZoo      | Pursuit           | Good           | 79.5 $\pm$ 10.8                  | 101249              |
|                 |                   | Medium         | 22.7 $\pm$ 12.4                  | 100087              |
|                 |                   | Poor           | -27.3 $\pm$ 14.0                 | 100000              |
|                 | Co-op Pong        | Good           | 65.1 $\pm$ 35.6                  | 100687              |
|                 |                   | Medium         | 35.6 $\pm$ 29.9                  | 101490              |
|                 |                   | Poor           | 14.4 $\pm$ 18.7                  | 102277              |
|                 | Pistonball        | Good           | 84.6 $\pm$ 17.9                  | 208518              |
|                 |                   | Medium         | 34.1 $\pm$ 25.6                  | 200142              |
|                 |                   | Poor           | 12.0 $\pm$ 22.6                  | 200000              |
| Flatland        | 3 Trains          | Good           | -5.2 $\pm$ 8.0                   | 23000               |
|                 |                   | Medium         | -16.1 $\pm$ 11.8                 | 19800               |
|                 |                   | Poor           | -28.8 $\pm$ 11.8                 | 19200               |
|                 | 5 Trains          | Good           | -5.9 $\pm$ 8.0                   | 20600               |
|                 |                   | Medium         | -16.3 $\pm$ 10.2                 | 18000               |
|                 |                   | Poor           | -25.5 $\pm$ 10.5                 | 17600               |
| SMAC v2         | terrann_5_vs_5    | Replay         | 10.4 $\pm$ 5.9                   | 97795               |
|                 | zerg_5_vs_5       | Replay         | 7.5 $\pm$ 3.6                    | 137776              |
|                 | terrann_10_vs_10  | Replay         | 11.4 $\pm$ 5.6                   | 75355               |
| CityLearn       | 2022_all_phases   | Replay         | -6820.7 $\pm$ 458.4              | 169068              |
| Voltage Control | case33_3min_final | Replay         | -25.1 $\pm$ 22.3                 | 40541               |

678 **C.1 Violin Plots**

679 In addition to the table with mean episode returns, we also provide violin plots for all datasets in  
 680 OG-MARL in order to visualise the distribution of episode returns induced by the behaviour policies.

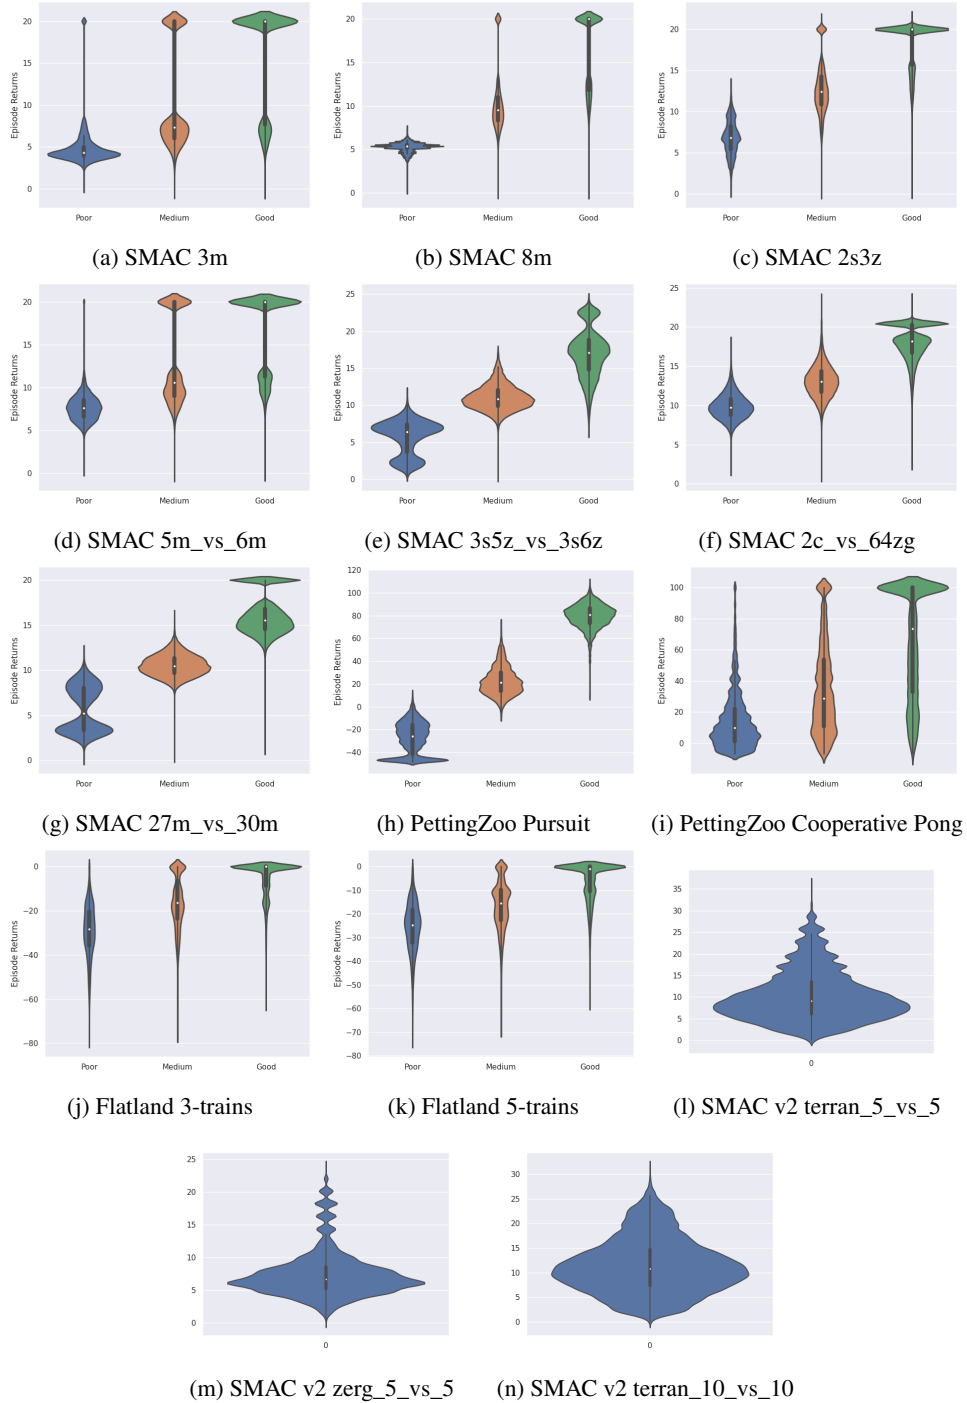

Figure C.1: Violin plots of all datasets with discrete actions.

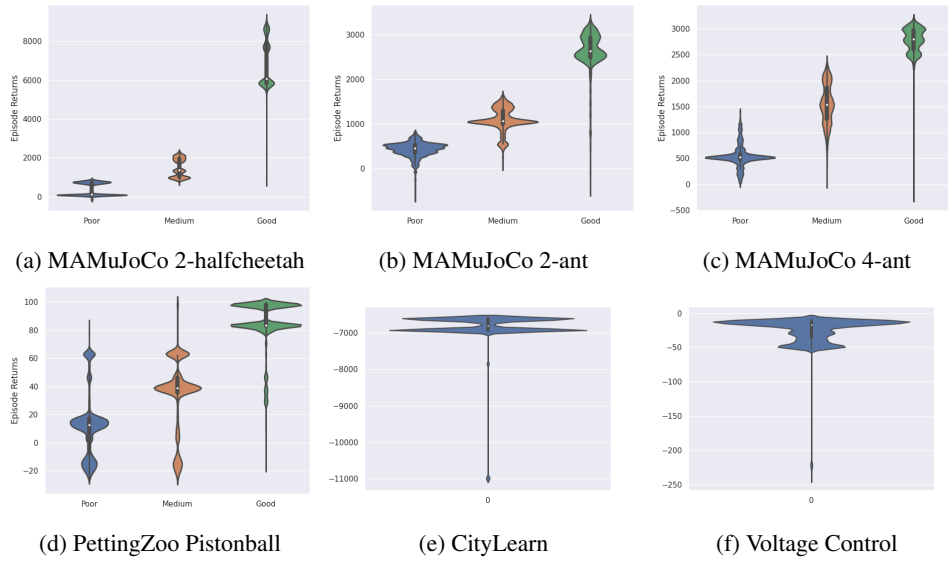

Figure C.2: Violin plots of all datasets with continuous actions.

## 681 D Additional Baseline Information

682 In this section, we provide additional implementation details for each of the baseline algorithms  
683 implemented in OG-MARL as well as the hyper-parameters used for the experiments and additional  
684 results.

### 685 D.1 Background: Single Agent Offline RL Algorithms

686 As mentioned in the main text, the primary challenge algorithms need to address during offline  
687 training is data distribution mismatch between the behaviour (offline) data and the induced online  
688 data. For example, the state visitation frequency induced by the behaviour policy is typically different  
689 to that of the learnt policy. While state distribution mismatch can cause failure when the algorithm  
690 is deployed, it does not generally cause any issues during training, and can easily be mitigated by  
691 expanding the breadth and diversity of the dataset (Agarwal et al., 2019). On the other hand, the most  
692 common and difficult-to-address type of distribution mismatch in offline RL is out-of-distribution  
693 (OOD) actions. An offline RL algorithm may assign a high value to an OOD action during training  
694 due to the extrapolation done by the neural network (Fujimoto et al., 2019). These errors then tend  
695 to propagate to other state-action pairs, as Q-learning and related algorithms use bootstrapping to  
696 compute Bellman targets (Kumar et al., 2019). The propagation of extrapolation error then manifests  
697 itself as a kind of “unlearning”, where the performance of the offline RL algorithm rapidly starts to  
698 degrade with further training. Most of the remedies proposed in the literature to address OOD actions  
699 can be grouped into one of two categories.

700 **Policy constraints.** Several methods try to restrict the degree to which the learnt policy can become  
701 off-policy with respect to the behavioural policy. These methods tend to incorporate some form of  
702 behaviour cloning (BC) into RL algorithms to force the learnt policy to remain relatively online with  
703 respect to the behaviour dataset. *Batch-Constrained Q-learning* (BCQ) (Fujimoto et al., 2019) and  
704 *Twin Delayed DDPG + behaviour cloning* (TD3 + BC) (Fujimoto and Gu, 2021) are two popular  
705 algorithms in this class.

706 **Conservative value regularisation.** The second approach mitigates extrapolation error by regularis-  
707 ing the learnt value function to avoid overestimating values for OOD actions. An example of this  
708 approach, called *conservative Q-learning* (CQL), has been successfully applied to Q-learning and  
709 actor-critic methods by Kumar et al. (2020) in single-agent offline RL.

### 710 D.2 Multi-Agent Offline MARL Algorithms

711 At the time of writing, there are only a handful of cooperative offline MARL algorithms available in  
712 the literature and we endeavoured to implement as many of them as possible in OG-MARL. However,  
713 several algorithms proposed in the literature do not have open-source implementations online and  
714 were therefore challenging to re-implement. In Table D.1 we give an overview of all the algorithms  
715 in the literature and whether we re-implemented them in OG-MARL.

### 716 D.3 Implementation Details

717 In this section, we highlight the most important implementation details for the algorithms in OG-  
718 MARL and refer the reader to our open-source code for finer details.

719 **QMIX.** Our QMIX implementation is very similar to the original (Rashid et al., 2018). We use a  
720 single shared Q-network for all agents and concatenate agent IDs to the agent observations so that the  
721 network can distinguish between different agents. As in the original QMIX paper, our Q-network is  
722 a recurrent network that takes independent agent observations as input, while the mixing network  
723 conditions on global state information. To improve the performance of our QMIX implementation,  
724 we adopt the recommendation from Hu et al. (2021) to use *Q-lambda* (Sutton and Barto, 2018) to  
725 compute target Q-values.



Table D.1: An overview of cooperative offline MARL algorithms from the literature grouped by the work that proposed them as a novel algorithm or baseline. In the second column, we indicate if the code for the algorithm was originally made available online (open-sourced) and in the third column we indicate if the algorithm is implemented in OG-MARL. Algorithms in bold were the main contribution of the respective work while the rest are baselines used in the work. QMIX+CQL and QMIX+BCQ are novel baselines proposed in this work.

| Algorithm Name | Open-Sourced | OG-MARL |
|----------------|--------------|---------|
| MABCQ          | x            | x       |
| MAICQ          | ✓            | ✓       |
| DOP+CQL        | x            | x       |
| DOP+BCQ        | x            | x       |
| <b>OMAR</b>    | ✓            | ✓       |
| ITD3+CQL       | ✓            | ✓       |
| ITD3+BC        | x            | ✓       |
| MATD3+CQL      | x            | ✓       |
| MATD3+BC       | x            | ✓       |
| QMIX+CQL       | n/a          | ✓       |
| QMIX+BCQ       | n/a          | ✓       |

726 **QMIX+CQL.** We add conservative Q-learning (Kumar et al., 2020) to QMIX by uniformly sampling  
727 a number of joint-actions from the joint-action space and using those to select Q-values before passing  
728 them through the mixing network and using the resulting *mixed* Q-values to calculate the CQL-loss  
729 term.

730 **QMIX+BCQ.** We add discrete BCQ (Fujimoto et al., 2019) to QMIX by additionally training a  
731 behaviour cloning policy which we use to evaluate how likely each action is to be taken by the  
732 behaviour policy given the dataset. If the likelihood is below some threshold, we mask out that action  
733 during Q-learning in QMIX.

734 **MAICQ.** Our MAICQ implementation is as close as possible to the original by Yang et al. (2021).

735 **ITD3 and MATD3.** Our ITD3 and MATD3 use a shared policy network and shared Q-network, and  
736 concatenate agent IDs to agent observations. The policy is a recurrent neural network with a single  
737 GRU layer while the critic is a feedforward neural network that takes the global state as input instead  
738 of the observations.

739 **ITD3+BC and MATD3+BC.** We incorporate behaviour cloning into ITD3 and MATD3 by adding a  
740 behaviour cloning term to the policy learning step as in Fujimoto and Gu (2021)

741 **ITD3+CQL and MATD3+CQL.** We incorporate conservative Q-learning into ITD3 and MATD3 in  
742 a very similar way to how it was done by Pan et al. (2022).

743 **OMAR** We tried to keep our implementation of OMAR as close to the original (Pan et al., 2022) as  
744 possible. The main difference in our implementation is that the policy is a recurrent network, while  
745 in the original, they used a feedforward network.

#### 746 D.4 Hyper-Parameters

747 In this section, we highlight the values we used for the most important hyper-parameters in our  
748 benchmark experiments. For additional details about the hyper-parameters we used, we refer to  
749 the `experiments` directory in our open-source code. In Table D.2 and Table D.3 we give the  
750 hyper-parameters for SMAC and MAMuJoCo experiments respectively. In order to keep the online  
751 evaluation budget fixed (Kurenkov and Kolesnikov, 2022) we tuned hyperparameters on *3m* and  
752 *2-Agent HalfCheetah* for SMAC and MAMuJoCo respectively.

Table D.2: Hyper-Parameters for Discrete Action Algorithms.

| Algorithm                 | Hyper-Parameter Name                         | Value          |
|---------------------------|----------------------------------------------|----------------|
| <b>All</b>                | Batch Size                                   | 32             |
|                           | Optimiser                                    | Adam           |
|                           | Learning Rate                                | 1e-3           |
|                           | Hidden Activation Function                   | ReLu           |
|                           | Q-Lambda                                     | 0.6            |
| <b>BC</b>                 | Policy Linear Layer Dimension                | 64             |
|                           | Policy GRU Layer Dimension                   | 64             |
| <b>QMIX</b>               | Q-Network Linear Layer Dimension             | 64             |
|                           | Q-Network Linear Layers Dimension            | 64             |
|                           | Hyper-Network Dimension                      | 64             |
|                           | Mixing Embedding Dimension                   | 32             |
|                           | Soft Target Update Rate                      | 1e-2           |
| <b>QMIX+BCQ</b>           | QMIX Hyper-Parameters                        | Same as above. |
|                           | Behaviour Network Linear Layer Dimension     | 64             |
|                           | Behaviour Network GRU Layer Dimension        | 64             |
|                           | Behaviour Threshold                          | 0.4            |
| <b>QMIX+CQL</b>           | QMIX Hyper-Parameters                        | Same as above. |
|                           | CQL Alpha                                    | 2.0            |
|                           | Number of Sampled Actions                    | 20             |
| <b>MAICQ</b>              | Policy Network Linear Layer Dimension        | 64             |
|                           | Policy Network GRU Layer Dimension           | 64             |
|                           | Critic Network First Linear Layer Dimension  | 64             |
|                           | Critic Network Second Linear Layer Dimension | 64             |
|                           | Mixing Hyper-Network Dimension               | 64             |
|                           | Mixing Embedding Dimension                   | 64             |
|                           | MAICQ Epsilon                                | 0.5            |
|                           | MAICQ Advantages Beta                        | 0.1            |
| MAICQ Target Q-Taken Beta | 1000                                         |                |

Table D.3: Hyper-Parameters for Continuous Action Algorithms.

| Algorithm       | Hyper-Parameter Name           | Value          |
|-----------------|--------------------------------|----------------|
| <b>All</b>      | Batch Size                     | 32             |
|                 | Optimiser                      | Adam           |
|                 | Learning Rate                  | 5e-4           |
|                 | Hidden Activation Function     | ReLU           |
|                 | Policy Linear Layer Dimension  | 128            |
|                 | Policy GRU Layer Dimension     | 128            |
| <b>ITD3</b>     | Critic Linear Layer Dimension  | 128            |
|                 | Critic Linear Layers Dimension | 128            |
|                 | Target Update Rate             | 0.01           |
| <b>ITD3+BC</b>  | Behaviour Cloning Alpha        | 2.5            |
| <b>ITD3+CQL</b> | CQL Alpha                      | 10.0           |
|                 | Number of OOD Actions          | 10             |
| <b>OMAR</b>     | CQL Parameters                 | Same as above. |
|                 | OMAR Iterations                | 3              |
|                 | OMAR Number of Samples         | 20             |
|                 | OMAR Number of Elites          | 5              |
|                 | OMAR Sigma                     | 2.0            |
|                 | OMAR Coefficient               | 0.7            |

753 **D.5 Additional Results**

754 In this section, we provide additional baseline results on datasets in OG-MARL.

755 **Discrete Actions.** In [Table D.4](#) we give the baseline results on datasets with discrete actions. In

756 [Figure D.1](#) we provide the aggregated performance profiles for SMAC.

Table D.4: Baseline results on datasets with discrete actions. The mean episode return with one standard deviation across all seeds is given. The best mean episode return in each row is given in bold.

| Environment | Scenario        | Dataset | BC               | QMIX       | QMIX+BCQ        | QMIX+CQL        | MAICQ           |
|-------------|-----------------|---------|------------------|------------|-----------------|-----------------|-----------------|
| SMAC        | 3m              | Good    | 16.0±1.0         | 13.8±4.5   | 16.3±1.5        | <b>19.6±0.3</b> | 18.8±0.6        |
|             |                 | Medium  | 8.2±0.8          | 17.3±0.9   | 18.3±1.2        | <b>18.9±1.2</b> | 18.1±0.7        |
|             |                 | Poor    | 4.4±0.1          | 10.0±2.9   | 12.4±2.3        | 5.8±0.4         | <b>14.4±1.2</b> |
|             | 8m              | Good    | 16.7±0.4         | 4.6±2.8    | 12.7±6.3        | 11.3±6.1        | <b>19.6±0.3</b> |
|             |                 | Medium  | 10.7±0.5         | 13.9±1.6   | 16.0±1.4        | 16.8±3.1        | <b>18.6±0.5</b> |
|             |                 | Poor    | 5.3±0.1          | 6.0±1.3    | 5.8±1.4         | 4.6±2.4         | <b>10.8±0.8</b> |
|             | 5m_vs_6m        | Good    | <b>16.6±0.6</b>  | 8.0±0.5    | 8.3±0.9         | 13.8±3.9        | 16.3±0.9        |
|             |                 | Medium  | 12.4±0.9         | 11.9±1.1   | 12.1±1.3        | <b>16.9±1.2</b> | 15.3±0.7        |
|             |                 | Poor    | 7.5±0.2          | 10.7±0.9   | <b>11.0±0.9</b> | 10.4±1.0        | 9.4±0.4         |
|             | 27m_vs_30m      | Good    | 15.7±0.3         | 3.2±1.4    | 10.2±1.4        | 6.0±3.3         | <b>16.1±1.8</b> |
|             |                 | Medium  | 10.3±0.4         | 6.2±2.1    | 9.8±1.2         | 8.0±1.7         | <b>12.9±0.5</b> |
|             |                 | Poor    | 6.0±1.5          | 2.1±1.7    | <b>10.3±0.7</b> | 3.7±2.7         | 10.1±0.8        |
|             | 2s3z            | Good    | 18.2±0.4         | 5.9±3.4    | 16.6±1.2        | 19.0±0.8        | <b>19.6±0.3</b> |
|             |                 | Medium  | 12.3±0.7         | 5.2±0.9    | 13.6±1.5        | 14.3±2.0        | <b>17.2±0.6</b> |
|             |                 | Poor    | 6.7±0.3          | 3.8±1.2    | 11.5±1.0        | 10.1±0.7        | <b>12.1±0.4</b> |
|             | 3s5z_vs_3s6z    | Good    | 15.0±0.6         | 3.1±1.3    | 8.4±0.7         | 7.3±1.9         | <b>16.2±0.7</b> |
|             |                 | Medium  | 10.6±0.2         | 3.0±1.0    | 10.5±0.8        | 8.1±3.1         | <b>12.3±0.3</b> |
|             |                 | Poor    | 6.1±0.3          | 2.8±1.0    | 8.2±0.9         | 2.9±0.9         | <b>8.4±0.2</b>  |
|             | 2c_vs_64zg      | Good    | 17.5±0.4         | 10.9±4.0   | 18.7±0.8        | 18.1±0.8        | <b>19.3±0.3</b> |
|             |                 | Medium  | 12.5±0.3         | 16.8±1.6   | <b>18.4±0.5</b> | 14.9±0.7        | 14.6±0.6        |
|             |                 | Poor    | 9.7±0.2          | 11.6±2.2   | <b>14.3±0.8</b> | 12.1±0.4        | 12.5±0.4        |
| PettingZoo  | Co-op Pong      | Good    | 31.2±3.5         | 0.6±3.5    | 1.9±1.1         | <b>90.0±4.7</b> | 75.4±3.9        |
|             |                 | Medium  | 21.6±4.8         | 10.6±17.6  | 20.3±12.2       | 64.9±15.0       | <b>84.6±0.9</b> |
|             |                 | Poor    | 1.0±0.9          | 14.4±16.0  | 30.2±20.7       | 52.7±8.5        | <b>74.8±7.8</b> |
|             | Pursuit         | Good    | 78.3±1.8         | 6.7±19.0   | 66.9±14.0       | 54.4±6.3        | <b>92.7±3.7</b> |
|             |                 | Medium  | 15.0±1.6         | -24.4±20.2 | 16.6±10.7       | 20.6±10.3       | <b>35.3±3.0</b> |
|             |                 | Poor    | -18.5±1.6        | -43.7±5.6  | <b>-0.7±4.0</b> | -19.6±3.3       | -4.1±0.7        |
| Flatland    | 3 Trains        | Good    | -5.6±2.4         | -3.6±0.4   | -3.5±2.8        | <b>-2.1±0.4</b> | -25.3±0.2       |
|             |                 | Medium  | <b>-4.5±2.5</b>  | -12.5±1.0  | -7.1±2.7        | -4.6±0.5        | -25.2±0.2       |
|             |                 | Poor    | <b>-11.4±3.8</b> | -27.9±0.8  | -17.3±4.1       | -24.9±0.4       | -25.9±0.9       |
|             | 5 Trains        | Good    | -28.1±1.4        | -6.4±0.6   | -8.1±4.9        | <b>-3.2±0.5</b> | -25.6±0.5       |
|             |                 | Medium  | -9.7±5.7         | -17.9±1.0  | -10.6±8.4       | <b>-3.7±0.3</b> | -25.9±0.5       |
|             |                 | Poor    | -9.9±3.8         | -24.7±1.9  | <b>-9.5±6.6</b> | -11.1±4.0       | -25.6±0.4       |
| SMACv2      | terran_5_vs_5   | Replay  | 7.3±1.0          | 13.7±2.7   | <b>13.8±4.4</b> | 11.8±0.9        | 13.7±1.7        |
|             | zerg_5_vs_5     | Replay  | 6.8±0.6          | 10.2±2.4   | 10.3±1.2        | 10.3±3.4        | <b>10.6±0.7</b> |
|             | terran_10_vs_10 | Replay  | 7.4±0.5          | 10.4±2.5   | 12.7±2.0        | 11.8±2.0        | <b>14.4±0.7</b> |

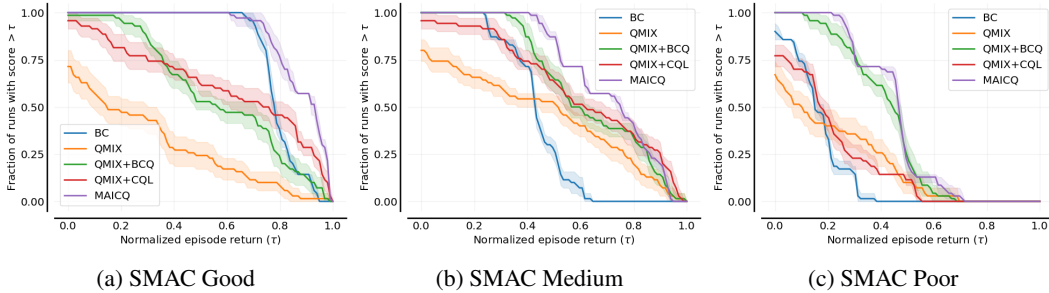

Figure D.1: Aggregated performance profiles (Agarwal et al., 2021) for SMAC. Shaded regions show pointwise 95% confidence bands based on percentile bootstrap with stratified sampling. Results were aggregated across all scenarios and seeds.

757 **Continuous Actions.** In [Table D.5](#) we give the baseline results on datasets with continuous actions.  
 758 In [Figure D.2](#) we provide the aggregated performance profiles for MAMuJoCo.

Table D.5: Baseline results on datasets with continuous actions. The mean episode return with one standard deviation across all seeds is given. The best mean episode return in each row is given in bold.

| Environment    | Scenario          | Dataset | BC              | ITD3      | ITD3+BC         | ITD3+CQL       | OMAR      |
|----------------|-------------------|---------|-----------------|-----------|-----------------|----------------|-----------|
| MAMuJoCo       | 2-HalfCheetah     | Good    | 6846±574        | -578±33   | <b>7025±439</b> | 2934±1666      | 1434±1903 |
|                |                   | Medium  | 1627±187        | -87±223   | <b>2561±82</b>  | 1755±283       | 1892±220  |
|                |                   | Poor    | 465±59          | -392±76   | 736±72          | <b>739±191</b> | 384±420   |
|                | 2-Ant             | Good    | 2697±267        | -1274±501 | <b>2922±194</b> | 606±487        | 464±469   |
|                |                   | Medium  | <b>1145±126</b> | -1416±845 | 744±283         | 716±431        | 799±186   |
|                |                   | Poor    | 954±80          | 741±398   | <b>1256±122</b> | 814±177        | 857±73    |
|                | 4-Ant             | Good    | <b>2802±133</b> | -1033±432 | 2628±971        | 712±672        | 344±631   |
|                |                   | Medium  | 1617±153        | -1159±733 | <b>1843±494</b> | 1190±186       | 929±349   |
|                |                   | Poor    | 1033±122        | 703±465   | <b>1075±96</b>  | 518±122        | 518±112   |
| PettingZoo     | Pistonball        | Good    | <b>94.1±1.2</b> | 0.8±10.6  | 93.1±2.0        | - <sup>2</sup> | -         |
|                |                   | Medium  | 10.3±6.0        | -5.5±3.2  | <b>13.7±8.9</b> | -              | -         |
|                |                   | Poor    | 4.6±3.2         | -5.8±2.3  | <b>6.1±2.5</b>  | -              | -         |
| CityLearn      | 2022_all_phases   | Replay  | <b>-6576±39</b> | -6594±1   | -6663±87        | -6598±9        | -6630±44  |
| VoltageControl | case33_3min_final | Replay  | <b>-9.9±2.3</b> | -10.0±0.8 | -11.1±0.7       | -32.9±6.7      | -26.5±9.4 |

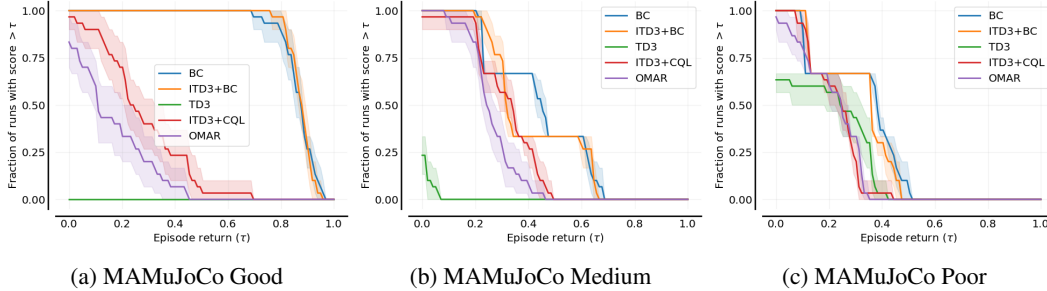

Figure D.2: Aggregated performance profiles (Agarwal et al., 2021) for MAMuJoCo. Shaded regions show pointwise 95% confidence bands based on percentile bootstrap with stratified sampling. Results were aggregated across all scenarios and seeds.

## 759 D.6 Reproducing Baseline Results

760 Scripts for reproducing our baseline experiments are included in the open-sourced code.

## 761 D.7 Baseline Compute Budget

762 To run all of our baselines we used CPUs on an internal compute cluster. In total we used 546 days of  
 763 CPU compute time.

<sup>2</sup>Due to the nature of the CQL and OMAR algorithms, and the large number of agents in Pistonball we have not managed to successfully run these experiments without running out of RAM on the compute available to us. We are working on resolving this for the camera ready version.

## 764 **E Dataset Licence, Author Statement, Hosting & Maintenance Plan**

### 765 **E.1 Dataset Licence**

766 The datasets in OG-MARL are licenced under the Common Dataset Licences, **CC BY-NC-SA**.<sup>3</sup>  
767 This license allows reusers to distribute, remix, adapt, and build upon the material in any medium or  
768 format for noncommercial purposes only, and only so long as attribution is given to the creator. If  
769 you remix, adapt, or build upon the material, you must license the modified material under identical  
770 terms.

### 771 **E.2 Author Statement**

772 The authors of "Off-the-Grid MARL: Datasets with Baselines for Offline Multi-Agent Reinforcement  
773 Learning" bear all responsibility in case of any violation of rights during the collection of the data or  
774 other work, and will take appropriate action when needed, e.g. to remove data with such issues.

### 775 **E.3 Hosting & Maintenance Plan**

776 The OG-MARL datasets are hosted in an accessible, online storage bucket, kindly hosted by <anony-  
777 mous organisation>. An easy-to-use interface for downloading datasets from the bucket is provided  
778 via our website. Datasets will continue to be maintained by the authors and dataset versions will be  
779 tracked on the OG-MARL GitHub repository. The OG-MARL code will also be tracked on GitHub.  
780 Issues and feature requests can be submitted on the GitHub repository.

781 *Note: the OG-MARL GitHub repository is currently set to private during the anonymous review phase*  
782 *but will be made public as soon as the anonymous review is over. For now, all of the OG-MARL code*  
783 *is available for download from our anonymised website.*

---

<sup>3</sup><https://paperswithcode.com/datasets/license>
